# Supplementary material
Source: Research Square preprint supplement (doi:10.21203/rs.3.rs-10096332/v1)
Supplement: Supplementary file 1 [file f6e404c0551bbb08d8f41665.docx]

## Appendices

### Appendix A. Applied methodological checklist

| Item | Compliance | Note |
| --- | --- | --- |
| Structured question (PIO) | ✓ | Section 2.2 |
| Search in ≥4 databases | ✓ | 6 databases consulted |
| Explicit inclusion/exclusion criteria | ✓ | Section 2.4 |
| Two-reviewer screening | ✓ | Section 2.5 |
| Quality appraisal (JBI) | ✓ | Section 2.6 |
| Structured narrative synthesis | ✓ | Section 3 |
| Presentation of verifiable DOIs | ✓ | 47 references with DOI |
| Stated limitations | ✓ | Section 4.3 |

### Appendix B. Reproducibility note

Full search strings, extraction forms, and primary data for the included Peruvian studies are available upon request from the authors for replication purposes.

**Conflict of interest:** The authors declare no conflicts of interest.

**Funding:** This research did not receive any specific external funding.

**Acknowledgments:** To the educational communities of Cusco, Ayacucho, Ica, Puno, Ucayali, and Áncash who participated in the preliminary validation of the proposed solutions.
